# Supplementary material for: Pediatric Healthcare Worker Perspectives on Implementation of a Secure Firearm Storage Program: A Qualitative Study
Source: Research Square preprint supplement (doi:10.21203/rs.3.rs-7437500/v1), 2025-10-08
Supplement: Supplementary file 1 [file 701af8afbe6c97630635917c.docx]

**ASPIRE Qualitative Interview Guide**

**Participant Information (for all participants)**

1. First, could you tell me your job title and briefly what you do in this position?

**If they have multiple job titles, ask about each one.*

1. *Is this the position you have held for the majority of the last 12 months?*
   - *If no: what position did you hold the majority of the last 12 months? Can you briefly tell me what you did in that position?*
2. What are your role(s) related to *S.A.F.E. Firearm* (e.g., clinician who delivers the program, point person who helps with locks deliveries, leader, stakeholder group)?
3. How long have you been at [organization]?
4. Which clinic or clinics do you support in your role as ________ (from question 1a)?
   1. If they see patients, What is your primary clinic, or the clinic where you see the most patients for well-child visits?

**General Questions about Firearms (for all participants)**

(Primary Care and Suicide Prevention): First, I’d like to hear your thoughts about the role of pediatrics and/or primary care in firearm safety promotion for pediatric populations.

1. (Firearm Culture)
   1. Can you tell me your thoughts about the culture around firearms in the community your primary clinic serves?

**If they ask what you mean by culture*: this can include the beliefs, customs, and reasons that people keep firearms.

**General Reflections on *S.A.F.E. Firearm* (for all participants)**

*Next, we are interested in hearing your thoughts about the implementation of the S.A.F.E. Firearm program in your health system. S.A.F.E. Firearm has two components: providing brief counseling around secure firearm storage (less than 1 min) to the parents/ guardians of all youth who present for well-child visits, and (b) offering free firearm cable locks to all families. I’m interested in your perspectives on the implementation of this program. It’s important for you to know that there are NO right or wrong answers. I’m really interested in your opinion.*

*When you answer these questions, please think specifically about your experiences with S.A.F.E. Firearm at [CLINIC NAME], which is the clinic where you mentioned you see the most well-child visits (clinicians who see patients) / work the most hours (point people who don’t see patients).*

1. Do you have any questions about *S.A.F.E. Firearm* before we continue?
2. (General reactions): Can you tell me what you think about the *S.A.F.E. Firearm* program? We’re really interested in hearing your candid feedback, since it will help us make the program better in the future.

*Probes:*

- *Do you find this program acceptable? If not, can you explain what makes it feel unacceptable?*
- *What do you think are pros of S.A.F.E. Firearm to achieve a goal of increasing secure firearm storage in your patients’ homes?*
- *What do you think are cons of this strategy to achieve that same goal?*
- *What changes do you think we need to make to the program to make it better?*

**Questions about Nudges (only ask to people who see patients / deliver *S.A.F.E. Firearm*)**

Screenshare the nudge one-pager with them when asking this question

Henry Ford

At Henry Ford, we deployed a change to the well-child visit template – the .gunsafety smartphrase – to prompt you to have a brief conversation with parents about secure firearm storage and to offer cable locks.

Kaiser

At KPCO, we deployed a change to the well-child visit template – the Firearm Safety SmartList – to prompt you to have a brief conversation with parents about secure firearm storage and to offer cable locks.

Question for both Henry Ford and Kaiser

1. Tell me about your experience with the firearm safety smartlist section (KP) / .gunsafety smartphrase (HF).

*Probes:*

- *What made it easier to use?*
- *What made it harder to use?*
- *Did it fit within your workflow during the well-child visit?*

*Additional probes if time:*

- *Do you have thoughts about how to improve it?*
- *What did you think about the communication from your clinic or health system that you received related to the smartphrase (HF) / SmartList (KP)?*
- *What did you think about the training you received related to the smartphrase (HF) / SmartList (KP) and how to use it?*

**Questions about Facilitation (ask to people affiliated with specific Nudge+ clinic(s))**

As you may know, your clinic received facilitation as part of the *S.A.F.E. Firearm* program. Specifically, Facilitator X/Facilitator Y, who is an employee of your health system, was in contact with your clinic to provide support with delivery of *S.A.F.E. Firearm* – for example, she may have:

- asked how *S.A.F.E. Firearm* is going
- helped troubleshoot when issues arose
- shared data reports, and/or
- helped with deliveries of firearm locks and figuring out where to store the locks in your clinic.

1. Tell me about your experience with facilitation and working with the facilitator?

*Probes:*

- *Did you interact with facilitator much?*
  - *If yes*
    - *How so?*
    - *What was it like working with them?*
  - *If no, were there any particular reasons why you didn’t work with them?*
- *Was there anything that made it easier harder to work with them and/or engage in facilitation activities?*
- *What aspects of facilitation were particularly helpful to help engage providers within your clinic in S.A.F.E. Firearm and/or increase uptake of the program at your clinic? For example:*
  - *Problem-solving implementation challenges with the facilitator (e.g., where to store locks)*
  - *Receiving data about how your clinic is doing with implementing S.A.F.E. Firearm*
  - *General reminders and check ins*
- *What aspects of facilitation felt unnecessary or not worth the time?*

*Additional probes if time:*

- *Do you think facilitation helped lead to more discussions about S.A.F.E. Firearm among providers and staff at your clinic (for example, during one-on-one conversations or during huddles)?*
- *How did facilitation fit within your workflow or day to day activities at your clinic?*
- *Do you have thoughts about how to improve facilitation?*
- *What did you think about how facilitation was rolled out in your clinic?*

**(Decision-Making): Only ask to people who see patients / who deliver *S.A.F.E. Firearm***

Next, can you please walk me through your decision-making process during a well-child visit related to firearm safety discussions. What makes you decide to engage in the S.A.F.E Firearm program with a particular child and family? What factors make you decide *not* to engage?

*Probes:*

- Did patients’ responses on the pre-visit questionnaire about firearm ownership impact your delivery of *S.A.F.E. Firearm* at all? If yes, how so.
- Did parents ever change their answer about firearm ownership from the pre-visit screener when you were discussing firearm storage with them during the visit?
  - For example, did they say no on the pre-visit questionnaire, but disclosed they own firearms when you were talking to them during the visit?
- *In your opinion, do you think all patients should have a conversation about secure firearm storage? Why do you feel that way?*
- *Did parents’/guardians’ responses to a screening question about firearm access impact your delivery of S.A.F.E. Firearm at all? For example, did you change what you said, or decide whether or not to deliver S.A.F.E. Firearm, based on the responses to the questionnaire?*
- *Even though SAFE Firearm is designed for well-child visits, did you offer firearm locks during other visits? For example, during adult well-visits or child or adult sick visits*

*Additional probes if time:*

- *How important is it to you to deliver the S.A.F.E. Firearm program as part of the well-child visit?*
- *Were there any adjustments that you made to accommodate certain families versus others? For example, did you phrase the conversation differently for some families versus others? Why?*
- *Do you think some families are more likely to benefit from S.A.F.E. Firearm than others?*
- *Do you think some families are more likely to change their firearm storage behaviors than others after receiving S.A.F.E. Firearm?*

**Specific Feedback on *S.A.F.E. Firearm* (Barriers and Helpers):**

*Now I’d like to ask you some more detailed questions on your thoughts about any barriers and things that made it easier to implement the S.A.F.E. Firearm program. By barriers, we mean anything that has gotten in the way of launching, delivering, or sustaining S.A.F.E. Firearm in your primary clinic. Things that made it easier to implement the S.A.F.E. Firearm program can be anything that supported the launch, delivery, or maintenance S.A.F.E. Firearm in your primary clinic.*

*You may not have much else to share after sharing your general thoughts about S.A.F.E. Firearm earlier in our conversation – that’s okay! I’ll just ask these questions in case they spark any additional thoughts for you.*

*Note to interviewer: it’s okay to move through these quickly if the participant doesn’t have much else to share. You don’t need to spend a lot of time probing to try to get them to think of something to say for each question.*

- Was there anything about the *S.A.F.E. Firearm* program itself (e.g., doing counseling, providing free locks, providing the parent handout, the clinician training) that made it easier or harder to implement at your clinic?
- Was there anything that made it easier or harder for you personally to implement the *S.A.F.E. Firearm* program?
  - *Probe: For example, how knowledgeable and confident you feel about the program, your relationships with the patients, or your personal beliefs about firearms?*
- *Skip if short on time:* Do you think there was anything that made it harder or easier for your colleagues to implement the *S.A.F.E. Firearm* program?
- What aspects of your primary clinic made it easier or harder to implement *S.A.F.E. Firearm*?
  - *Probe: For example, infrastructure at your clinic, procedures or policies at your clinic, staffing shortages, or support from your supervisors?*
- Were there challenges or things that went well regarding integrating *S.A.F.E. Firearm* into your clinic workflow, especially related to getting locks delivered to the clinic and distributed within the clinic?
- Did any aspects of the larger Kaiser Permanente Colorado / Henry Ford Health environment make it easier or harder to implement *S.A.F.E. Firearm*?
  - *Probe: For example, were there any competing programs that took time away from S.A.F.E. Firearm or any system-wide practice changes?*
- Lastly, were there any characteristics outside of the clinic (at the local, state, or national-level) that influenced implementation of *S.A.F.E. Firearm*?
  - *Probe: For example, this could be laws, location of the clinic, or current events in your community.*

1. (Sustainment)

- What supports do you think would be needed from your clinic or health system if you were to try to sustain *S.A.F.E. Firearm* at your clinic long-term?
  - *Probes: For example, additional funding, more staff, or more space.*

**Additional Questions (if time)**

1. (Training). Only ask to people who see patients / deliver *S.A.F.E. Firearm*

- What kinds of training activities did you participate in for *S.A.F.E. Firearm*? As a reminder, our team presented at a pediatrics team meeting, we offered the recording from that live training, we shared the PowerPoint slides, and the PowerPoint slides linked to additional trainings from the Academy of Pediatrics.
- What did you think of the initial training that was offered to you by our research teams at Penn and Henry Ford / Kaiser? Did you feel ready to deliver *S.A.F.E. Firearm* after the training?
  - *If yes, can you share which parts were helpful?*
  - *If no, what did you feel was missing from the training?*
  - *Did you talk to other colleagues to learn more about how they were delivering S.A.F.E. Firearm?*

1. (Supplemental materials). What did you think of the parent handouts and clinic flyers for *S.A.F.E. Firearm*?

**Demographics (optional)**

If you are comfortable, would you be willing to answer a few questions about your demographic characteristics? These are entirely optional.

1. What is your current gender identity?You may select all that apply.

- Male
- Female
- Trans male/trans man
- Trans female/trans woman
- Genderqueer/gender non-conforming
- Different identity (please state): _____________________
- Prefer not to answer

1. What is your race? You may select all that apply.

- American Indian or Alaska Native
- Asian
- Native Hawaiian or Other Pacific Islander
- Black or African American
- White
- Other (please state): _______
- Prefer not to answer

1. Do you identify as Hispanic or Latino/a/x?

- Yes
- No
- Prefer not to answer

That was my last question. Thank you for participating in this interview today!
